# Supplementary material for: Modeling Climate Change Indicates Potential Shifts in the Global Distribution of Orchardgrass
Source: MDPI journal article supplement (doi:10.3390/agronomy13081985), 2023-07-27
Supplement: s1 [file s1]

**Table S1** The occurrence records of orchardgrass in the world

| Longitude   | Latitude    | Occurrence status | Longitude   | Latitude  | Occurrence status | Longitude  | Latitude  | Occurrence status |
|-------------|-------------|-------------------|-------------|-----------|-------------------|------------|-----------|-------------------|
| 70.83       | 36.75       | Afghanistan       | 12.874688   | 47.992058 | Austria           | -7.473089  | 54.123465 | Ireland           |
| 69.04       | 35.32       | Afghanistan       | 16.481231   | 47.841565 | Austria           | 12.435955  | 45.63717  | Italy             |
| 71          | 35.25       | Afghanistan       | 11.407015   | 47.285949 | Austria           | 11.155869  | 46.674636 | Italy             |
| 69.03       | 34.55       | Afghanistan       | 10.969013   | 47.057178 | Austria           | 12.051161  | 44.211525 | Italy             |
| 72          | 36.75       | Afghanistan       | 12.44128    | 46.75403  | Austria           | 7.253753   | 45.70202  | Italy             |
| 44.650803   | 40.132141   | Armenia           | 5.09258     | 51.26672  | Belgium           | 13.016033  | 42.55688  | Italy             |
| 44.715976   | 40.53174    | Armenia           | 4.64581     | 50.83713  | Belgium           | 11.222323  | 44.444273 | Italy             |
| 46.53305    | 38.895317   | Armenia           | 3.70723     | 50.95248  | Belgium           | 12.302245  | 42.040055 | Italy             |
| 45.407009   | 39.833915   | Armenia           | 5.36162     | 50.78381  | Belgium           | 12.0338    | 43.25765  | Italy             |
| 45.95028    | 39.50083    | Armenia           | 26.047518   | 41.612525 | Bulgaria          | 10.402994  | 42.766333 | Italy             |
| 44.76556    | 41.15722    | Armenia           | 25.41629    | 43.020962 | Bulgaria          | 9.6735     | 40.5411   | Italy             |
| 45.44472    | 40.86583    | Armenia           | 23.34857    | 42.673062 | Bulgaria          | 8.296477   | 46.086835 | Italy             |
| 43.99972    | 40.32417    | Armenia           | 23.781453   | 42.902689 | Bulgaria          | 8.59903    | 44.545095 | Italy             |
| 44.20528    | 41.1375     | Armenia           | 22.686111   | 43.611111 | Bulgaria          | 12.327016  | 45.150819 | Italy             |
| 45.12806    | 41.16306    | Armenia           | 27.99167    | 41.98667  | Bulgaria          | 8.959067   | 45.358273 | Italy             |
| 46.575      | 39.69667    | Azerbaijan        | 27.41833    | 42.04556  | Bulgaria          | 13.922454  | 42.465532 | Italy             |
| 46.70139    | 39.81417    | Azerbaijan        | 27.70556    | 43.22806  | Bulgaria          | 10.244617  | 44.893452 | Italy             |
| 48.93       | 40.54       | Azerbaijan        | 29.19285    | 53.142857 | Belarus           | 10.658043  | 43.659274 | Italy             |
| 46.9986     | 40.0017     | Azerbaijan        | 26.724052   | 54.99511  | Belarus           | 16.547214  | 40.145852 | Italy             |
| 33.86       | 35.1        | Cyprus            | 27.538972   | 52.774763 | Belarus           | 12.976692  | 43.840475 | Italy             |
| 32.92       | 34.76       | Cyprus            | 23.859314   | 53.809039 | Belarus           | 11.541495  | 45.472289 | Italy             |
| 33.11       | 35.3        | Cyprus            | 27.773418   | 53.95988  | Belarus           | 7.191959   | 44.955931 | Italy             |
| 1.158907    | 33.572022   | Algeria           | 27.860929   | 51.717457 | Belarus           | 12.847288  | 43.351403 | Italy             |
| 6.903272    | 36.273543   | Algeria           | 26.413732   | 54.135102 | Belarus           | 140.309213 | 35.75324  | Japan             |
| 4.39309     | 35.962452   | Algeria           | 28.424882   | 55.265314 | Belarus           | 126.275471 | 36.713168 | Korea             |
| 5.916667    | 35.833333   | Algeria           | 24.429269   | 53.41967  | Belarus           | 128.840972 | 36.822427 | Korea             |
| 8.32222     | 36.60667    | Algeria           | 30.329512   | 55.66841  | Belarus           | 126.784103 | 35.177536 | Korea             |
| 5.509037965 | 36.51883387 | Algeria           | 28.76059    | 55.486    | Belarus           | 126.559417 | 33.438167 | Korea             |
| 31.22       | 29.9        | Egypt             | 30.362935   | 53.895688 | Belarus           | 128.031888 | 37.839366 | Korea             |
| 34.46667    | 31.5        | Egypt             | 28.917423   | 54.298077 | Belarus           | 128.053972 | 36.184417 | Korea             |
| 42.55876    | 43.13523    | Georgia           | -82.255357  | 45.909776 | Canada            | 128.161028 | 35.112639 | Korea             |
| 43.092758   | 42.45934    | Georgia           | -71.928795  | 45.394172 | Canada            | 24.404761  | 54.216707 | Lithuania         |
| 40.630664   | 43.528194   | Georgia           | -113.933789 | 53.410554 | Canada            | 24.513432  | 55.286793 | Lithuania         |
| 46.5392     | 41.3486     | Georgia           | -61.950605  | 45.625305 | Canada            | 23.788318  | 55.195674 | Lithuania         |
| 41.468582   | 43.034016   | Georgia           | -137.79407  | 60.85381  | Canada            | 25.72281   | 55.594702 | Lithuania         |
| 45.887382   | 41.67517    | Georgia           | -119.265194 | 52.815306 | Canada            | 23.517462  | 56.11787  | Lithuania         |
| 44.45333    | 42.4925     | Georgia           | -119.893117 | 49.201    | Canada            | 5.927286   | 49.552933 | Luxembourg        |
| 41.02       | 43          | Georgia           | -114.893117 | 49.694444 | Canada            | 6.08274    | 49.9405   | Luxembourg        |
| 44.55       | 41.83       | Georgia           | -128.973306 | 55.292    | Canada            | 6.08182    | 49.9398   | Luxembourg        |

|           |           |        |             |           |                |           |           |             |
|-----------|-----------|--------|-------------|-----------|----------------|-----------|-----------|-------------|
| 34.875275 | 32.305159 | Israel | -132.11875  | 53.251167 | Canada         | 25.13854  | 56.69089  | Latvia      |
| 35.29     | 33.04     | Israel | -79.097355  | 43.863682 | Canada         | 22.721    | 57.288    | Latvia      |
| 35.02     | 31.28     | Israel | -80.731993  | 42.878767 | Canada         | 24.485365 | 57.841719 | Latvia      |
| 80.211113 | 30.063627 | India  | -83.034124  | 42.256814 | Canada         | 24.36231  | 56.86902  | Latvia      |
| 74.748906 | 34.206203 | India  | -73.875546  | 45.100088 | Canada         | 5.812655  | 53.217264 | Netherlands |
| 78.96     | 20.59     | India  | -75.72261   | 45.390225 | Canada         | 4.128604  | 51.926401 | Netherlands |
| 85.293333 | 25.039167 | India  | -123.498313 | 48.494575 | Canada         | 5.220278  | 51.956389 | Netherlands |
| 76.844732 | 20.108176 | India  | 8.766757    | 47.441309 | Switzerland    | 6.75      | 53.2      | Netherlands |
| 76.334005 | 32.245765 | India  | 9.499506    | 47.020097 | Switzerland    | 4.55      | 51.9      | Netherlands |
| 77.03     | 32.58     | India  | 9.284097    | 46.786364 | Switzerland    | 3.95      | 51.3      | Netherlands |
| 76.7      | 11.42     | India  | 7.911046    | 47.120295 | Switzerland    | 6.6       | 52.2      | Netherlands |
| 78.62     | 29.8      | India  | 7.357615    | 46.489573 | Switzerland    | 6         | 52.5      | Netherlands |
| 75.6      | 32.5      | India  | 10.265556   | 46.793346 | Switzerland    | 5.337011  | 60.392592 | Norway      |
| 76.73     | 11.4      | India  | 9.010645    | 45.852797 | Switzerland    | 8.553614  | 59.591063 | Norway      |
| 76.98     | 9.57      | India  | 17.878403   | 49.88009  | Czech Republic | 7.889283  | 62.580075 | Norway      |
| 88.27     | 27.03     | India  | 18.377766   | 49.889215 | Czech Republic | 10.107736 | 60.842801 | Norway      |
| 75.42     | 34.26     | India  | 15.317001   | 49.143451 | Czech Republic | 5.871308  | 61.948113 | Norway      |
| 78.28     | 31.59     | India  | 14.666878   | 48.887506 | Czech Republic | 9.715406  | 61.645744 | Norway      |
| 78.285098 | 30.411189 | India  | 12.642337   | 49.809362 | Czech Republic | 7.419393  | 58.010531 | Norway      |
| 44.6      | 36.566667 | Iraq   | 14.053314   | 50.64779  | Czech Republic | 7.711156  | 61.052622 | Norway      |
| 43.94     | 36.61     | Iraq   | 15.173361   | 50.701118 | Czech Republic | 10.259937 | 60.16978  | Norway      |
| 46.19     | 35.38     | Iraq   | 16.289535   | 48.769575 | Czech Republic | 5.259438  | 59.416051 | Norway      |
| 45.05     | 36.67     | Iraq   | 12.924712   | 49.382203 | Czech Republic | 10.29313  | 63.06555  | Norway      |
| 42.85     | 37.27     | Iraq   | 15.733543   | 50.217975 | Czech Republic | 11.347986 | 63.966889 | Norway      |
| 45.43     | 35.55     | Iraq   | 16.536616   | 49.225    | Czech Republic | 6.561304  | 58.272573 | Norway      |
| 43        | 36.8833   | Iraq   | 16.145135   | 50.24318  | Czech Republic | 11.441456 | 59.11177  | Norway      |
| 50.288056 | 34.730278 | Iran   | 14.029767   | 49.694315 | Czech Republic | 10.721339 | 60.946355 | Norway      |
| 50.997422 | 35.804462 | Iran   | 12.272859   | 50.150809 | Czech Republic | 18.369209 | 54.234722 | Poland      |
| 45.019573 | 37.595242 | Iran   | 13.629636   | 50.056012 | Czech Republic | 18.351446 | 54.244587 | Poland      |
| 59.299902 | 36.40555  | Iran   | 11.031689   | 50.097782 | Germany        | 22.015314 | 50.257783 | Poland      |
| 51.591939 | 33.585643 | Iran   | 10.172145   | 54.303911 | Germany        | 20.91072  | 52.339177 | Poland      |
| 58.98194  | 36.46944  | Iran   | 10.818841   | 51.051342 | Germany        | 22.604034 | 53.29964  | Poland      |
| 57.375627 | 37.936616 | Iran   | 9.372888    | 48.61578  | Germany        | 17.248486 | 52.838353 | Poland      |
| 48.995028 | 37.286806 | Iran   | 10.190489   | 47.647619 | Germany        | 16.130227 | 53.101745 | Poland      |
| 52.264861 | 35.934056 | Iran   | 8.873786    | 52.488386 | Germany        | 17.190616 | 51.071936 | Poland      |
| 48.58     | 32.62     | Iran   | 7.475921    | 51.695869 | Germany        | 17.417573 | 51.687944 | Poland      |
| 49.77     | 32.78     | Iran   | 10.950945   | 54.327691 | Germany        | 21.781855 | 53.621667 | Poland      |
| 47.06     | 34.32     | Iran   | 8.045452    | 51.087156 | Germany        | 19.554586 | 51.861522 | Poland      |
| 47.6      | 35.87     | Iran   | 7.923739    | 47.983026 | Germany        | 14.795424 | 51.575675 | Poland      |
| 51.67     | 32.7      | Iran   | 10.182551   | 48.873884 | Germany        | 22.417959 | 50.051847 | Poland      |
| 47.29     | 32.91     | Iran   | 6.764755    | 50.612474 | Germany        | 15.7587   | 50.915861 | Poland      |

|           |           |            |           |           |         |            |           |          |
|-----------|-----------|------------|-----------|-----------|---------|------------|-----------|----------|
| 53.1      | 36.7      | Iran       | 10.988536 | 52.475382 | Germany | 20.140013  | 49.719201 | Poland   |
| 45.77     | 38.43     | Iran       | 8.42282   | 48.955971 | Germany | -8.740802  | 41.942845 | Portugal |
| 55.17     | 37.25     | Iran       | 11.432443 | 48.163726 | Germany | -8.552776  | 37.754101 | Portugal |
| 35.43333  | 30.33333  | Jordan     | 6.956654  | 49.689332 | Germany | -8.511667  | 39.430833 | Portugal |
| 35.8833   | 32.3      | Jordan     | 12.328358 | 47.83732  | Germany | -7.59      | 41.51     | Portugal |
| 35.9      | 31.4667   | Jordan     | 11.39898  | 53.850688 | Germany | -9.204616  | 38.926896 | Portugal |
| 74.495254 | 42.655837 | Kyrgyzstan | 12.208398 | 56.017961 | Denmark | -17.003473 | 32.69247  | Portugal |
| 79.268417 | 42.624486 | Kyrgyzstan | 9.191913  | 56.574998 | Denmark | 23.574931  | 46.759916 | Romania  |
| 71.958303 | 41.810315 | Kyrgyzstan | 8.508842  | 55.656606 | Denmark | 23.3825    | 45.185278 | Romania  |
| 72.497778 | 41.534167 | Kyrgyzstan | 9.452439  | 54.960773 | Denmark | 24.685578  | 45.070941 | Romania  |
| 72.0775   | 40.201944 | Kyrgyzstan | 9.104232  | 55.504191 | Denmark | 27.610464  | 47.161794 | Romania  |
| 76.0209   | 42.8212   | Kyrgyzstan | 11.99684  | 55.109693 | Denmark | 26.054201  | 45.225704 | Romania  |
| 74.77     | 41.2      | Kyrgyzstan | 9.276798  | 57.143645 | Denmark | 21.806574  | 46.112339 | Romania  |
| 76.04583  | 41.15139  | Kyrgyzstan | 8.820446  | 56.991463 | Denmark | 23.593246  | 45.98317  | Romania  |
| 78.24583  | 42.32528  | Kyrgyzstan | 26.26735  | 59.34881  | Estonia | 25.462681  | 45.604449 | Romania  |
| 76.975143 | 43.082581 | Kazakhstan | 26.96401  | 58.38237  | Estonia | 24.047194  | 45.885188 | Romania  |
| 78.735168 | 44.858639 | Kazakhstan | 22.95802  | 58.88085  | Estonia | 25.691944  | 46.074722 | Romania  |
| 85.0383   | 49.521    | Kazakhstan | 25.416667 | 58.95     | Estonia | 23.561031  | 46.760644 | Romania  |
| 81.059703 | 45.765786 | Kazakhstan | 24.0715   | 58.538083 | Estonia | 25.20155   | 45.165113 | Romania  |
| 79.514236 | 43.293512 | Kazakhstan | -7.729196 | 42.059591 | Spain   | 21.241849  | 45.733956 | Romania  |
| 70.703716 | 42.86722  | Kazakhstan | -0.947364 | 41.706896 | Spain   | 26.156764  | 44.262222 | Romania  |
| 81.961441 | 45.303267 | Kazakhstan | -6.373779 | 39.450569 | Spain   | 26.496569  | 46.963326 | Romania  |
| 70.285549 | 42.489156 | Kazakhstan | 2.160259  | 41.693066 | Spain   | 27.033162  | 45.948538 | Romania  |
| 35.569613 | 33.854513 | Lebanon    | -4.375827 | 39.749097 | Spain   | 25.87388   | 47.929348 | Romania  |
| 22.5      | 31.5      | Libya      | -3.52143  | 42.035998 | Spain   | 20.402152  | 44.807743 | Serbia   |
| 20.14     | 32.16     | Libya      | -3.113073 | 36.776828 | Spain   | 22.326252  | 42.725221 | Serbia   |
| 12.52     | 32.02     | Libya      | -1.187817 | 42.676792 | Spain   | 19.822017  | 45.184681 | Serbia   |
| 13.03333  | 32.33333  | Libya      | -3.292357 | 43.050806 | Spain   | 19.284809  | 45.774464 | Serbia   |
| -6.99173  | 31.55532  | Morocco    | 22.263193 | 61.28252  | Finland | 19.81535   | 43.547482 | Serbia   |
| -6.36     | 34.2      | Morocco    | 22.212556 | 60.244446 | Finland | 21.035837  | 44.847154 | Serbia   |
| -3.98     | 35.23     | Morocco    | 25.431153 | 64.574799 | Finland | 20.145578  | 45.805021 | Serbia   |
| -4.16     | 34.08     | Morocco    | 24.205123 | 67.288358 | Finland | 20.416596  | 45.278666 | Serbia   |
| -7.86     | 31.2      | Morocco    | 23.824297 | 60.835712 | Finland | 13.00597   | 58.50818  | Swede    |
| -5.2263   | 33.3012   | Morocco    | 26.834299 | 63.963639 | Finland | 18.07945   | 59.51182  | Swede    |
| -5.3377   | 35.6223   | Morocco    | 21.754953 | 61.483112 | Finland | 12.92513   | 55.84295  | Swede    |
| -2.02     | 34.9      | Morocco    | 25.418852 | 64.808544 | Finland | 16.30638   | 60.55605  | Swede    |
| 92.58     | 46.79     | Mongolia   | 29.560137 | 61.56478  | Finland | 17.85566   | 60.18892  | Swede    |
| 73.01     | 34.67     | Pakistan   | 29.479318 | 65.21974  | Finland | 13.39947   | 55.5315   | Swede    |
| 74.17     | 35.24     | Pakistan   | 3.29044   | 43.50275  | France  | 17.29341   | 62.38415  | Swede    |
| 75.633333 | 35.3      | Pakistan   | 3.93419   | 44.14761  | France  | 13.65468   | 56.06315  | Swede    |
| 73.665581 | 30.486404 | Pakistan   | 4.36405   | 44.13754  | France  | 15.45404   | 58.45514  | Swede    |
| 73.399472 | 33.924497 | Pakistan   | 0.831671  | 50.984993 | UK      | 12.37545   | 57.50625  | Swede    |

|           |           |              |           |           |         |             |             |          |
|-----------|-----------|--------------|-----------|-----------|---------|-------------|-------------|----------|
| 69.798113 | 24.731826 | Pakistan     | -3.927075 | 50.411553 | UK      | 15.21751    | 60.66153    | Swede    |
| 44.318005 | 58.824855 | Russia       | -0.983719 | 53.134824 | UK      | 14.67596    | 56.99349    | Swede    |
| 35.004169 | 57.866997 | Russia       | -2.139275 | 53.950926 | UK      | 15.91445    | 57.24313    | Swede    |
| 45.223842 | 51.836843 | Russia       | -3.422691 | 50.889429 | UK      | 15.04016    | 59.45538    | Swede    |
| 44.323445 | 58.823988 | Russia       | -1.723522 | 52.177871 | UK      | 15.167584   | 45.847357   | Slovenia |
| 56.839691 | 61.820911 | Russia       | -1.722336 | 52.179007 | UK      | 13.895819   | 46.288778   | Slovenia |
| 59.917053 | 55.170814 | Russia       | -3.599392 | 55.974858 | UK      | 15.31364    | 45.460243   | Slovenia |
| 36.256743 | 54.097293 | Russia       | 0.867925  | 52.579595 | UK      | 14.91186    | 46.399664   | Slovenia |
| 44.322137 | 58.820022 | Russia       | -4.035429 | 51.619866 | UK      | 13.412071   | 46.299615   | Slovenia |
| 37.158314 | 53.879494 | Russia       | -2.236441 | 51.407474 | UK      | 19.547585   | 49.34034    | Slovakia |
| 38.002358 | 54.343614 | Russia       | -0.398441 | 52.789354 | UK      | 19.291251   | 48.120274   | Slovakia |
| 41.450303 | 57.827527 | Russia       | 1.580845  | 52.671285 | UK      | 21.387843   | 49.040701   | Slovakia |
| 56.840538 | 61.819809 | Russia       | 24.99     | 35.23     | Greece  | 21.330286   | 48.650333   | Slovakia |
| 44.327875 | 58.816307 | Russia       | 25.116667 | 39.9      | Greece  | 18.672508   | 49.308322   | Slovakia |
| 41.448405 | 57.808625 | Russia       | 26.016667 | 38.45     | Greece  | 17.453878   | 48.236282   | Slovakia |
| 44.321747 | 58.820055 | Russia       | 21.80111  | 39.55611  | Greece  | 21.701656   | 48.886799   | Slovakia |
| 34.345475 | 61.782572 | Russia       | 24.25944  | 41.37889  | Greece  | 19.207422   | 48.737519   | Slovakia |
| 44.343655 | 58.827392 | Russia       | 21.82556  | 38.90694  | Greece  | 21.697001   | 48.883013   | Slovakia |
| 44.021915 | 56.199524 | Russia       | 23.49167  | 37.46944  | Greece  | 18.141667   | 47.8575     | Slovakia |
| 83.003937 | 55.110885 | Russia       | 22.88194  | 40.49778  | Greece  | 31.112218   | 49.406815   | Ukraine  |
| 40.157126 | 50.088453 | Russia       | 21.33278  | 40.0775   | Greece  | 33.992619   | 44.75502    | Ukraine  |
| 28.077716 | 58.455869 | Russia       | 22.50806  | 39.46194  | Greece  | 31.001048   | 50.91901    | Ukraine  |
| 30.315188 | 60.038297 | Russia       | 23.73389  | 41.27389  | Greece  | 29.446686   | 50.743087   | Ukraine  |
| 32.326502 | 59.913683 | Russia       | 22.58     | 37.32889  | Greece  | 37.788479   | 49.932277   | Ukraine  |
| 38.181112 | 56.32457  | Russia       | 22.57389  | 38.03361  | Greece  | 34.414161   | 44.7446     | Ukraine  |
| 36.803117 | 55.74987  | Russia       | 15.174167 | 44.218613 | Croatia | 24.350966   | 50.949349   | Ukraine  |
| 28.383318 | 59.008117 | Russia       | 16.467222 | 46.343889 | Croatia | 24.421498   | 48.330363   | Ukraine  |
| 34.756303 | 59.395825 | Russia       | 18.725556 | 45.542222 | Croatia | 31.907733   | 49.228392   | Ukraine  |
| 28.884065 | 59.465191 | Russia       | 16.350368 | 45.503743 | Croatia | 33.989697   | 44.74972    | Ukraine  |
| 36.743953 | 32.636893 | Syria        | 16.642136 | 43.572669 | Croatia | 30.207975   | 50.560974   | Ukraine  |
| 35.982117 | 35.654369 | Syria        | 18.983251 | 45.353373 | Croatia | 31.877838   | 49.226963   | Ukraine  |
| 68.85     | 38.85     | Tajikstan    | 15.774783 | 43.761584 | Croatia | 31.332749   | 51.521313   | Ukraine  |
| 70.5667   | 39.85     | Tajikstan    | 17.014236 | 43.310661 | Croatia | 23.026727   | 49.144375   | Ukraine  |
| 69.24139  | 38.3625   | Tajikstan    | 15.76051  | 43.773326 | Croatia | 24.333557   | 50.957315   | Ukraine  |
| 70.02889  | 37.89722  | Tajikstan    | 13.80083  | 45.12111  | Croatia | 23.316478   | 49.718253   | Ukraine  |
| 71.53583  | 37.6825   | Tajikstan    | 17.125945 | 46.543685 | Hungary | 22.39713    | 48.22659    | Ukraine  |
| 70.73778  | 38.67139  | Tajikstan    | 18.375447 | 46.063868 | Hungary | 115.9287    | 29.57649722 | China    |
| 56.28     | 38.43     | Turkmenistan | 19.227399 | 46.765868 | Hungary | 119.5340472 | 35.441125   | China    |
| 57.87     | 40.93     | Turkmenistan | 21.295674 | 46.665115 | Hungary | 101.9566472 | 30.08232222 | China    |
| 56.3836   | 38.4997   | Turkmenistan | 18.663964 | 46.717545 | Hungary | 110.6033083 | 30.11798611 | China    |
| 56.7042   | 38.4881   | Turkmenistan | 16.528852 | 47.241901 | Hungary | 83.59324722 | 43.37993889 | China    |

|           |           |              |           |           |         |             |             |       |
|-----------|-----------|--------------|-----------|-----------|---------|-------------|-------------|-------|
| 56.3375   | 38.8642   | Turkmenistan | 20.952559 | 47.713921 | Hungary | 103.9707    | 27.42979444 | China |
| 10.1167   | 33.4833   | Tunisia      | 19.342558 | 47.700191 | Hungary | 110.1877778 | 32.85138889 | China |
| 9.28917   | 36.475    | Tunisia      | 20.226952 | 46.412793 | Hungary | 102.7155556 | 25.08638889 | China |
| 9.59306   | 36.88389  | Tunisia      | 18.251667 | 47.459722 | Hungary | 99.99553333 | 28.23646667 | China |
| 69.71472  | 41.67444  | Uzbekistan   | -6.878078 | 53.0901   | Ireland | 99.34722222 | 27.09266667 | China |
| 70.132712 | 41.146791 | Uzbekistan   | -7.860549 | 55.159382 | Ireland | 108.1577833 | 32.10901667 | China |
| 67.573471 | 38.417283 | Uzbekistan   | -9.493904 | 52.021548 | Ireland | 107.8263889 | 34.01277778 | China |
| 70.133    | 41.167    | Uzbekistan   | -6.182758 | 53.615081 | Ireland | 102.5452167 | 32.79832778 | China |
| 13.396472 | 47.312184 | Austria      | -6.419365 | 53.997449 | Ireland | 87.02838333 | 43.51566667 | China |
| 14.616757 | 48.199467 | Austria      | -9.238206 | 53.519598 | Ireland | 81.11644444 | 43.49108333 | China |
| 14.732067 | 47.652578 | Austria      | -8.587382 | 52.87358  | Ireland | 109.7750167 | 31.39576667 | China |

Table S2 Pearson correlation coefficient of environmental variables

|           | ESP      | Gravel   | OC       | PH       | Sand     | BIO1     | BIO2     | BIO3     | BIO4     | BIO5     | BIO6     | BIO7     | BIO8     | BIO9     | BIO10    | BIO11    | BIO12    | BIO13    | BIO14    | BIO15    | BIO16    | BIO17    | BIO18    | BIO19    | Elevation | AWC      | Bulk     | CECS     | Clay     | Drainage |
|-----------|----------|----------|----------|----------|----------|----------|----------|----------|----------|----------|----------|----------|----------|----------|----------|----------|----------|----------|----------|----------|----------|----------|----------|----------|-----------|----------|----------|----------|----------|----------|
| ESP       | 1        | -0.00759 | -0.08516 | 0.330043 | -0.02101 | 0.192129 | 0.178973 | 0.080663 | -0.09276 | 0.240976 | 0.154862 | -0.0639  | 0.104074 | 0.211789 | 0.234725 | 0.162366 | -0.11034 | -0.09108 | -0.09742 | 0.072287 | -0.09739 | -0.09724 | -0.13183 | -0.06126 | -0.00515  | -0.02802 | 0.065025 | -0.04535 | 0.066065 | -0.01809 |
| Gravel    | -0.00759 | 1        | -0.07441 | 0.209378 | -0.05479 | -0.09419 | -0.03877 | -0.09046 | 0.050293 | -0.1061  | -0.07462 | 0.03671  | -0.16665 | -0.05249 | -0.10542 | -0.07662 | -0.14343 | -0.11608 | -0.08411 | 0.050008 | -0.12335 | -0.0926  | -0.15884 | -0.0601  | 0.141252  | 0.43643  | 0.01788  | -0.09083 | -0.10745 | -0.0444  |
| OC        | -0.08516 | -0.07441 | 1        | -0.26121 | -0.26239 | -0.16136 | -0.12819 | -0.13244 | 0.139526 | -0.14876 | -0.15642 | 0.123165 | -0.09489 | -0.15732 | -0.15232 | -0.16157 | 0.019605 | -0.02073 | 0.083565 | -0.12954 | -0.01388 | 0.078696 | 0.046079 | 0.022096 | -0.08561  | -0.13203 | -0.86899 | 0.857749 | 0.108128 | -0.38521 |
| PH        | 0.330043 | 0.209378 | -0.26121 | 1        | -0.12525 | 0.134825 | 0.354729 | -0.08161 | 0.03562  | 0.280717 | 0.058205 | 0.093761 | 0.055996 | 0.157485 | 0.240597 | 0.078741 | -0.44193 | -0.35699 | -0.33078 | 0.190804 | -0.38211 | -0.34475 | -0.39554 | -0.3158  | 0.116802  | 0.140727 | 0.24252  | -0.01619 | 0.062136 | -0.0435  |
| Sand      | -0.02101 | -0.05479 | -0.26239 | -0.12525 | 1        | 0.035282 | 0.148441 | 0.0409   | -0.0191  | 0.055184 | 0.012268 | 0.017295 | 0.049818 | 0.018687 | 0.036672 | 0.028516 | -0.07976 | -0.05333 | -0.08791 | 0.109964 | -0.0556  | -0.08883 | -0.06569 | -0.07322 | 0.027689  | 0.337435 | 0.40008  | -0.51397 | -0.65723 | 0.613061 |
| BIO1      | 0.192129 | -0.09419 | -0.16136 | 0.134825 | 0.035282 | 1        | 0.577815 | 0.700191 | -0.54485 | 0.966992 | 0.973516 | -0.36915 | 0.944951 | 0.917657 | 0.976357 | 0.98027  | 0.539887 | 0.541428 | 0.315527 | -0.38942 | 0.561952 | 0.332164 | 0.51831  | 0.317164 | -0.69715  | -0.16145 | 0.143456 | -0.16915 | 0.315794 | 0.059062 |
| BIO2      | 0.178973 | -0.03877 | -0.12819 | 0.354729 | 0.148441 | 0.577815 | 1        | 0.431284 | -0.15139 | 0.648957 | 0.479306 | 0.125716 | 0.549039 | 0.515687 | 0.603111 | 0.527307 | 0.014369 | 0.097819 | -0.10901 | 0.055724 | 0.098323 | -0.11259 | 0.093985 | -0.09131 | -0.14133  | -0.0028  | 0.151546 | -0.08339 | 0.033937 | 0.120601 |
| BIO3      | 0.080663 | -0.09046 | -0.13244 | -0.08161 | 0.0409   | 0.700191 | 0.431284 | 1        | -0.85186 | 0.550785 | 0.798914 | -0.73476 | 0.5269   | 0.782052 | 0.562948 | 0.798119 | 0.636924 | 0.631831 | 0.352322 | -0.05144 | 0.640617 | 0.379944 | 0.478063 | 0.47641  | -0.2311   | -0.16875 | 0.08997  | -0.17077 | 0.300772 | 0.039858 |
| BIO4      | -0.09276 | 0.050293 | 0.139526 | 0.03562  | -0.0191  | -0.54485 | -0.15139 | -0.85186 | 1        | -0.32209 | -0.713   | 0.957172 | -0.30258 | -0.73147 | -0.35158 | -0.69857 | -0.55739 | -0.56105 | -0.2875  | 0.025469 | -0.56322 | -0.31912 | -0.35897 | -0.43029 | 0.114866  | 0.126508 | -0.08301 | 0.176909 | -0.29014 | -0.04519 |
| BIO5      | 0.240976 | -0.1061  | -0.14876 | 0.280717 | 0.055184 | 0.966992 | 0.648957 | 0.550785 | -0.32209 | 1        | 0.886675 | -0.12409 | 0.969982 | 0.826216 | 0.997183 | 0.900629 | 0.430737 | 0.436909 | 0.253218 | -0.40899 | 0.458651 | 0.262069 | 0.457074 | 0.223377 | -0.73272  | -0.1375  | 0.174135 | -0.12087 | 0.253778 | 0.063267 |
| BIO6      | 0.154862 | -0.07462 | -0.15642 | 0.058205 | 0.012268 | 0.973516 | 0.479306 | 0.798914 | -0.713   | 0.886675 | 1        | -0.56884 | 0.864661 | 0.955369 | 0.904398 | 0.997862 | 0.607685 | 0.601357 | 0.358746 | -0.35094 | 0.619927 | 0.380984 | 0.528618 | 0.396986 | -0.63133  | -0.1557  | 0.119585 | -0.1747  | 0.322635 | 0.04227  |
| BIO7      | -0.0639  | 0.03671  | 0.123165 | 0.093761 | 0.017295 | -0.36915 | 0.125716 | -0.73476 | 0.957172 | -0.12409 | -0.56884 | 1        | -0.13024 | -0.5806  | -0.16713 | -0.53944 | -0.53792 | -0.51336 | -0.31946 | 0.025621 | -0.51454 | -0.35144 | -0.3214  | -0.4546  | 0.051521  | 0.129164 | -0.05675 | 0.165601 | -0.28686 | -0.019   |
| BIO8      | 0.104074 | -0.16665 | -0.09489 | 0.055996 | 0.049818 | 0.944951 | 0.549039 | 0.5269   | -0.30258 | 0.969982 | 0.864661 | -0.13024 | 1        | 0.754871 | 0.976019 | 0.875069 | 0.471628 | 0.468695 | 0.291514 | -0.46601 | 0.492456 | 0.302499 | 0.529269 | 0.231886 | -0.76321  | -0.19914 | 0.12637  | -0.11033 | 0.243334 | 0.038274 |
| BIO9      | 0.211789 | -0.05249 | -0.15732 | 0.157485 | 0.018687 | 0.917657 | 0.515687 | 0.782052 | -0.73147 | 0.826216 | 0.955369 | -0.5806  | 0.754871 | 1        | 0.838211 | 0.955533 | 0.526536 | 0.527928 | 0.289934 | -0.28819 | 0.54211  | 0.312674 | 0.405313 | 0.373598 | -0.5499   | -0.1188  | 0.130602 | -0.15935 | 0.300434 | 0.034858 |
| BIO10     | 0.234725 | -0.10542 | -0.15232 | 0.240597 | 0.036672 | 0.976357 | 0.603111 | 0.562948 | -0.35158 | 0.997183 | 0.904398 | -0.16713 | 0.976019 | 0.838211 | 1        | 0.915318 | 0.459848 | 0.460428 | 0.278871 | -0.42865 | 0.482754 | 0.289227 | 0.4831   | 0.246157 | -0.75148  | -0.15791 | 0.168527 | -0.13442 | 0.281795 | 0.053967 |
| BIO11     | 0.162366 | -0.07662 | -0.16157 | 0.078741 | 0.028516 | 0.98027  | 0.527307 | 0.798119 | -0.69857 | 0.900629 | 0.997862 | -0.53944 | 0.875069 | 0.955533 | 0.915318 | 1        | 0.590077 | 0.592951 | 0.335327 | -0.33356 | 0.610785 | 0.356553 | 0.522578 | 0.372084 | -0.62253  | -0.15065 | 0.129996 | -0.179   | 0.315735 | 0.052566 |
| BIO12     | -0.11034 | -0.14343 | 0.019605 | -0.44193 | -0.07976 | 0.539887 | 0.014369 | 0.636924 | -0.55739 | 0.430737 | 0.607685 | -0.53792 | 0.471628 | 0.526536 | 0.459848 | 0.590077 | 1        | 0.912607 | 0.748994 | -0.32632 | 0.936825 | 0.78208  | 0.836354 | 0.763437 | -0.36587  | -0.20784 | -0.07139 | -0.05946 | 0.269022 | -0.05905 |
| BIO13     | -0.09108 | -0.11608 | -0.02073 | -0.35699 | -0.05333 | 0.541428 | 0.097819 | 0.631831 | -0.56105 | 0.436909 | 0.601357 | -0.51336 | 0.468695 | 0.527928 | 0.460428 | 0.592951 | 0.912607 | 1        | 0.478451 | -0.10615 | 0.992996 | 0.512464 | 0.783985 | 0.621608 | -0.31838  | -0.18728 | -0.01564 | -0.08273 | 0.267454 | -0.05887 |
| BIO14     | -0.09742 | -0.08411 | 0.083565 | -0.33078 | -0.08791 | 0.315527 | -0.10901 | 0.352322 | -0.2875  | 0.253218 | 0.358746 | -0.31946 | 0.291514 | 0.289934 | 0.278871 | 0.335327 | 0.748994 | 0.478451 | 1        | -0.47137 | 0.514605 | 0.992936 | 0.624786 | 0.677943 | -0.28545  | -0.1288  | -0.12242 | 0.029805 | 0.118293 | -0.04427 |
| BIO15     | 0.072287 | 0.050008 | -0.12954 | 0.190804 | 0.109964 | -0.38942 | 0.055724 | -0.05144 | 0.025469 | -0.40899 | -0.35094 | 0.025621 | -0.46601 | -0.28819 | -0.42865 | -0.33356 | -0.32632 | -0.10615 | -0.47137 | 1        | -0.1576  | -0.48433 | -0.30213 | -0.29763 | 0.563656  | 0.031462 | 0.15338  | -0.11407 | 0.013473 | 0.065173 |
| BIO16     | -0.09739 | -0.12335 | -0.01388 | -0.38211 | -0.0556  | 0.561952 | 0.098323 | 0.640617 | -0.56322 | 0.458651 | 0.619927 | -0.51454 | 0.492456 | 0.54211  | 0.482754 | 0.610785 | 0.936825 | 0.992996 | 0.514605 | -0.1576  | 1        | 0.548696 | 0.805738 | 0.644761 | -0.34354  | -0.19276 | -0.02518 | -0.08214 | 0.270772 | -0.0597  |
| BIO17     | -0.09724 | -0.0926  | 0.078696 | -0.34475 | -0.08883 | 0.332164 | -0.11259 | 0.379944 | -0.31912 | 0.262069 | 0.380984 | -0.35144 | 0.302499 | 0.312674 | 0.289227 | 0.356553 | 0.78208  | 0.512464 | 0.992936 | -0.48433 | 0.548696 | 1        | 0.644319 | 0.706936 | -0.29522  | -0.1382  | -0.12003 | 0.021978 | 0.133112 | -0.04506 |
| BIO18     | -0.13183 | -0.15884 | 0.046079 | -0.39554 | -0.06569 | 0.51831  | 0.093985 | 0.478063 | -0.35897 | 0.457074 | 0.528618 | -0.3214  | 0.529269 | 0.405313 | 0.4831   | 0.522578 | 0.836354 | 0.783985 | 0.624786 | -0.30213 | 0.805738 | 0.644319 | 1        | 0.423368 | -0.35743  | -0.19186 | -0.08662 | -0.02707 | 0.187186 | -0.0548  |
| BIO19     | -0.06126 | -0.0601  | 0.022096 | -0.3158  | -0.07322 | 0.317164 | -0.09131 | 0.47641  | -0.43029 | 0.223377 | 0.396986 | -0.4546  | 0.231886 | 0.373598 | 0.246157 | 0.372084 | 0.763437 | 0.621608 | 0.677943 | -0.29763 | 0.644761 | 0.706936 | 0.423368 | 1        | -0.23015  | -0.11964 | -0.06593 | -0.03185 | 0.190734 | -0.04548 |
| Elevation | -0.00515 | 0.141252 | -0.08561 | 0.116802 | 0.027689 | -0.69715 | -0.14133 | -0.2311  | 0.114866 | -0.73272 | -0.63133 | 0.051521 | -0.76321 | -0.5499  | -0.75148 | -0.62253 | -0.36587 | -0.31838 | -0.28545 | 0.563656 | -0.34354 | -0.29522 | -0.35743 | -0.23015 | 1         | 0.158384 | 0.016675 | -0.06959 | -0.04065 | 0.022987 |
| AWC       | -0.02802 | 0.43643  | -0.13203 | 0.140727 | 0.337435 | -0.16145 | -0.0028  | -0.16875 | 0.126508 | -0.1375  | -0.1557  | 0.129164 | -0.19914 | -0.1188  | -0.15791 | -0.15065 | -0.20784 | -0.18728 | -0.1288  | 0.031462 | -0.19276 | -0.1382  | -0.19186 | -0.11964 | 0.158384  | 1        | 0.179471 | -0.20984 | -0.32828 | 0.219059 |
| Bulk      | 0.065025 | 0.01788  | -0.86899 | 0.24252  | 0.40008  | 0.143456 | 0.151546 | 0.08997  | -0.08301 | 0.174135 | 0.119585 | -0.05675 | 0.12637  | 0.130602 | 0.168527 | 0.129996 | -0.07139 | -0.01564 | -0.12242 | 0.15338  | -0.02518 | -0.12003 | -0.08662 | -0.06593 | 0.016675  | 0.179471 | 1        | -0.759   | -0.23403 | 0.390275 |
| CECS      | -0.04535 | -0.09083 | 0.857749 | -0.01619 | -0.51397 | -0.16915 | -0.08339 | -0.17077 | 0.176909 | -0.12087 | -0.1747  | 0.165601 | -0.11033 | -0.15935 | -0.13442 | -0.179   | -0.05946 | -0.08273 | 0.029805 | -0.11407 | -0.08214 | 0.021978 | -0.02707 | -0.03185 | -0.06959  | -0.20984 | -0.759   | 1        | 0.297928 | -0.52337 |
| Clay      | 0.066065 | -0.10745 | 0.108128 | 0.062136 | -0.65723 | 0.315794 | 0.033937 | 0.300772 | -0.29014 | 0.253778 | 0.322635 | -0.28686 | 0.243334 | 0.300434 | 0.281795 | 0.315735 | 0.269022 | 0.267454 | 0.118293 | 0.013473 | 0.270772 | 0.133112 | 0.187186 | 0.190734 | -0.04065  | -0.32828 | -0.23403 | 0.297928 | 1        | -0.37957 |
| Drainage  | -0.01809 | -0.0444  | -0.38521 | -0.0435  | 0.613061 | 0.059062 | 0.120601 | 0.039858 | -0.04519 | 0.063267 | 0.04227  | -0.019   | 0.038274 | 0.034858 | 0.053967 | 0.052566 | -0.05905 | -0.05887 | -0.04427 | 0.065173 | -0.0597  | -0.04506 | -0.0548  | -0.04548 | 0.022987  | 0.219059 | 0.390275 | -0.52337 | -0.37957 | 1        |

**Table S3** Projected potential suitable areas for orchardgrass under current and future climate scenarios

| Parameters of potential suitable areas                    | ssp126                         |                                | ssp245                        |                                | ssp585                       |                               |
|-----------------------------------------------------------|--------------------------------|--------------------------------|-------------------------------|--------------------------------|------------------------------|-------------------------------|
|                                                           | 2041-2060                      | 2081-2100                      | 2041-2060                     | 2081-2100                      | 2041-2060                    | 2081-2100                     |
| Centroid coordinates (current)                            | 22°46'34.81"E<br>38°46'52.20"N |                                |                               |                                |                              |                               |
| Centroid coordinates (future)                             | 21°58'10.92"E<br>40°44'27.20"N | 19°40'54.65"E<br>40°53'48.28"N | 21°15'8.25"E<br>41°26'21.34"N | 20°10'53.52"E<br>41°53'46.02"N | 17°52'7.31"E<br>42°1'28.59"N | 10°42'6.34"E<br>43°38'50.65"N |
| Centroid shift distance                                   | 228.41 km                      | 353.49 km                      | 322.52 km                     | 409.98 km                      | 549.72 km                    | 1143.49 km                    |
| Centroid shift direction                                  | Northwest                      | Northwest                      | Northwest                     | Northwest                      | Northwest                    | Northwest                     |
| Range expansion                                           | 0.65%                          | 0.65%                          | 0.55%                         | 0.76%                          | 1.44%                        | 2.38%                         |
| No occupancy(absence in both current and future climates) | 84.41%                         | 84.41%                         | 84.51%                        | 84.30%                         | 83.62%                       | 82.68%                        |
| No change (presence in both current and future climates)  | 13.60%                         | 13.04%                         | 13.19%                        | 12.83%                         | 13.23%                       | 12.20%                        |
| Range contraction                                         | 1.34%                          | 1.90%                          | 1.75%                         | 2.11%                          | 1.71%                        | 2.73%                         |

**Table S4** The area change of suitable habitat of orchardgrass under different future climate scenarios on different continents.

| Continent     |              | ssp126(10 <sup>4</sup> km <sup>2</sup> ) |           | ssp245(10 <sup>4</sup> km <sup>2</sup> ) |           | ssp585(10 <sup>4</sup> km <sup>2</sup> ) |           |
|---------------|--------------|------------------------------------------|-----------|------------------------------------------|-----------|------------------------------------------|-----------|
|               |              | 2041-2060                                | 2081-2100 | 2041-2060                                | 2081-2100 | 2041-2060                                | 2081-2100 |
| Asia          | Expansion    | 21.37                                    | 20.49     | 23.78                                    | 27.28     | 38.13                                    | 34.77     |
|               | No occupancy | 3640.98                                  | 3641.85   | 3638.57                                  | 3635.07   | 3624.21                                  | 3627.58   |
|               | No change    | 662.33                                   | 623.05    | 638.46                                   | 607.15    | 628.08                                   | 524.19    |
|               | Contraction  | 75.33                                    | 114.60    | 99.20                                    | 130.51    | 109.57                                   | 213.46    |
| Europe        | Expansion    | 18.55                                    | 6.88      | 6.24                                     | 17.53     | 22.28                                    | 61.94     |
|               | No occupancy | 195.92                                   | 207.60    | 208.23                                   | 196.94    | 192.19                                   | 152.53    |
|               | No change    | 773.98                                   | 745.91    | 758.19                                   | 758.24    | 764.88                                   | 757.83    |
|               | Contraction  | 11.55                                    | 39.61     | 27.34                                    | 27.29     | 20.65                                    | 27.70     |
| Africa        | Expansion    | 4.37                                     | 5.23      | 10.19                                    | 12.06     | 33.22                                    | 72.78     |
|               | No occupancy | 2898.67                                  | 2897.81   | 2892.85                                  | 2890.98   | 2869.82                                  | 2830.25   |
|               | No change    | 72.06                                    | 63.40     | 67.00                                    | 67.75     | 70.31                                    | 65.65     |
|               | Contraction  | 24.90                                    | 33.57     | 29.97                                    | 29.21     | 26.65                                    | 31.32     |
| North America | Expansion    | 42.72                                    | 55.54     | 33.58                                    | 48.04     | 104.83                                   | 160.60    |
|               | No occupancy | 2093.32                                  | 2080.49   | 2102.46                                  | 2088.00   | 2031.21                                  | 1975.44   |
|               | No change    | 231.05                                   | 246.11    | 235.73                                   | 234.34    | 251.76                                   | 248.37    |
|               | Contraction  | 32.91                                    | 17.85     | 28.23                                    | 29.62     | 12.20                                    | 15.59     |
| South America | Expansion    | 0.40                                     | 0.70      | 0.53                                     | 0.61      | 0.81                                     | 2.53      |
|               | No occupancy | 1335.66                                  | 1335.36   | 1335.54                                  | 1335.45   | 1335.25                                  | 1333.53   |
|               | No change    | 47.20                                    | 40.17     | 42.15                                    | 34.35     | 34.67                                    | 27.73     |
|               | Contraction  | 16.74                                    | 23.76     | 21.78                                    | 29.59     | 29.27                                    | 36.20     |
| Oceania       | Expansion    | 3.67                                     | 3.94      | 2.29                                     | 1.16      | 3.08                                     | 2.36      |
|               | No occupancy | 837.47                                   | 837.19    | 838.85                                   | 839.98    | 838.06                                   | 838.77    |
|               | No change    | 44.16                                    | 41.89     | 36.43                                    | 30.65     | 37.90                                    | 31.01     |
|               | Contraction  | 14.70                                    | 16.97     | 22.43                                    | 28.22     | 20.96                                    | 27.86     |





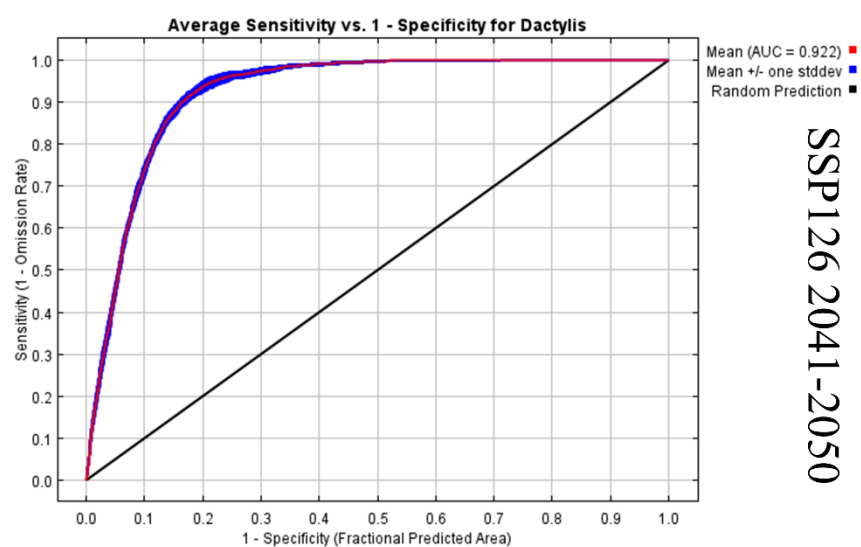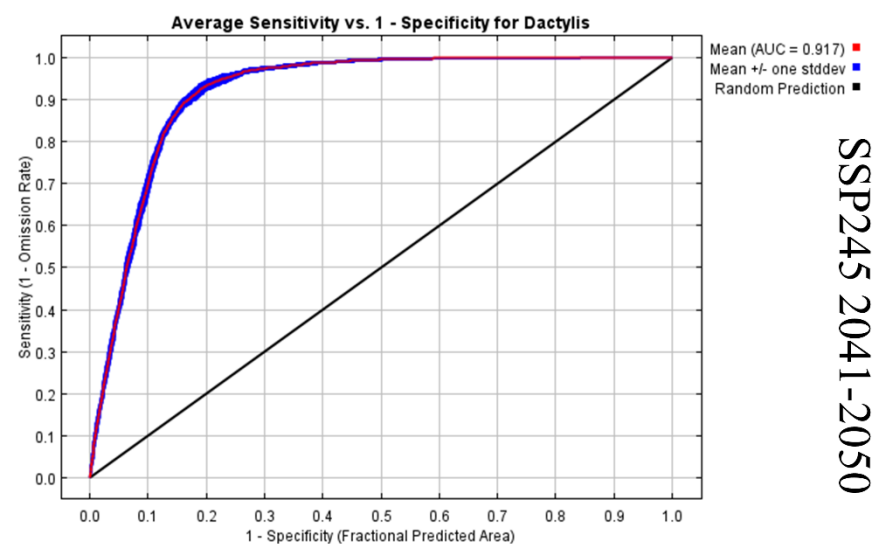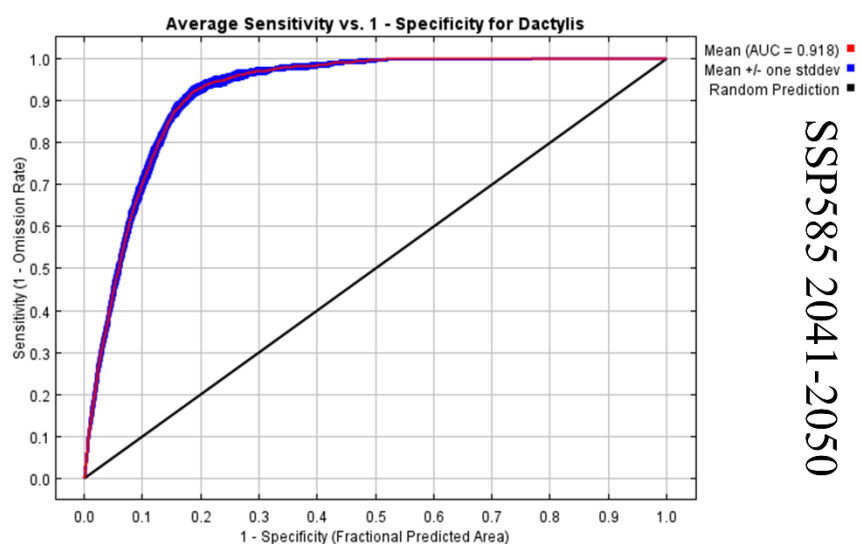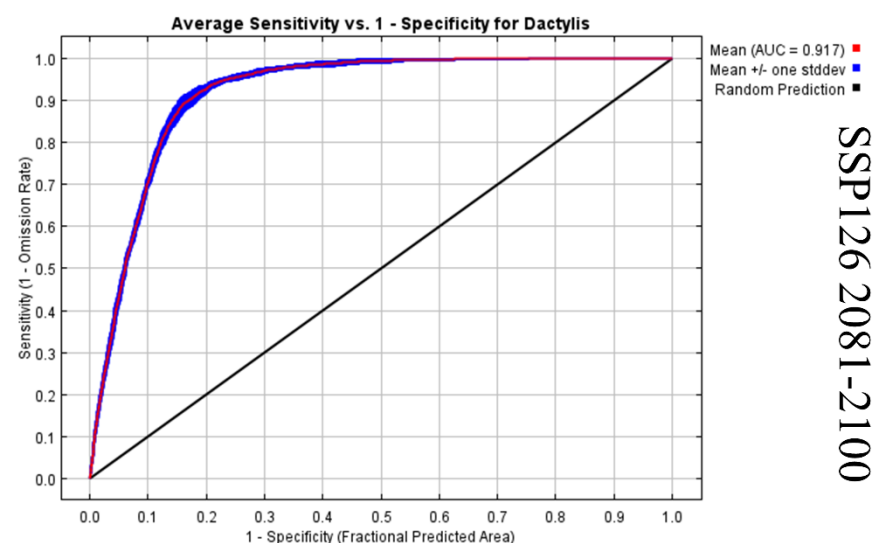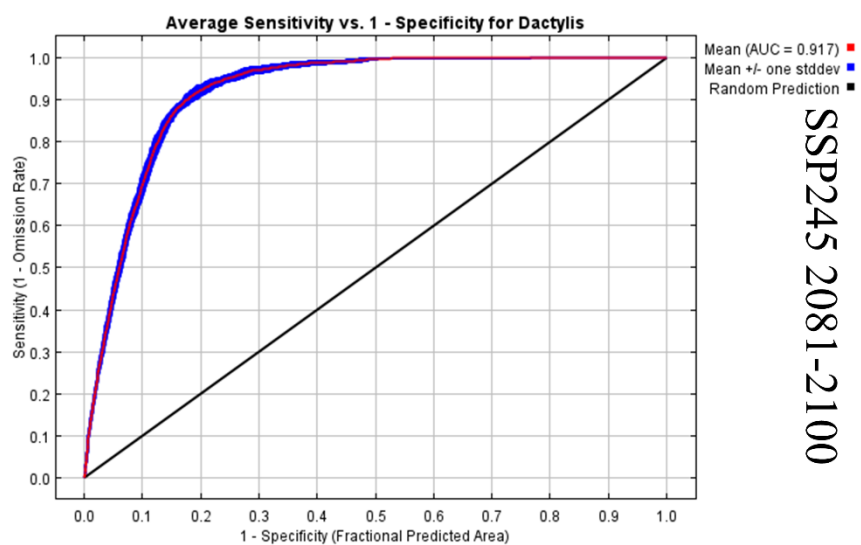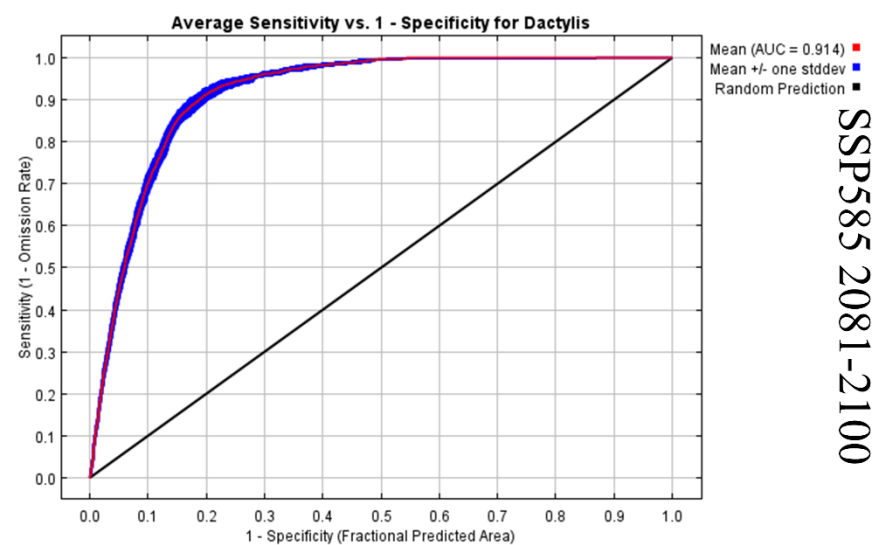

**Figure S1** Receiver operating characteristic under future climate conditions

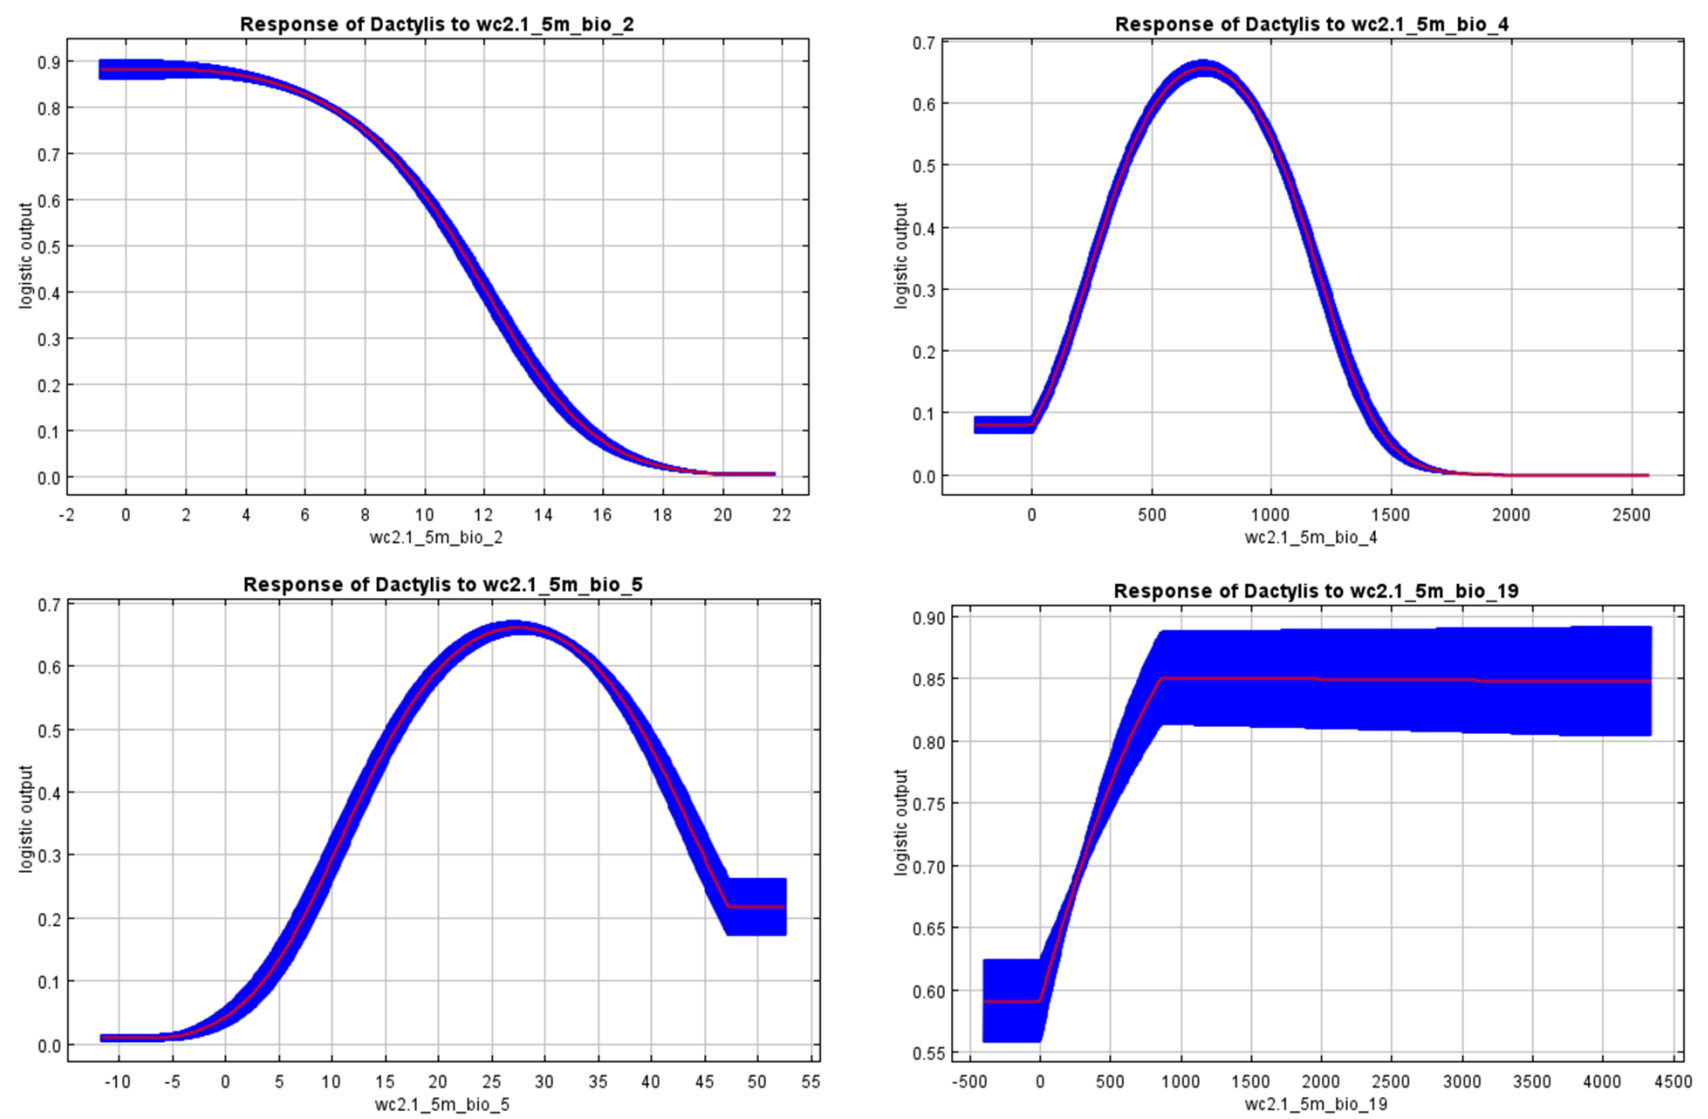

**Figure S2** Response curves of the main predictors of orchardgrass citri occurrence probability. Curves show the mean response over ten replicate Maxent runs (red) and the mean  $\pm 1$  SD (blue, two shades for categorical variables).
